# Supplementary figures and images for: A near ambient pressure XPS study of Au oxidation
Source: Royal Society of Chemistry journal article supplement (doi:10.1039/c4cp00308j), 2014-01-01

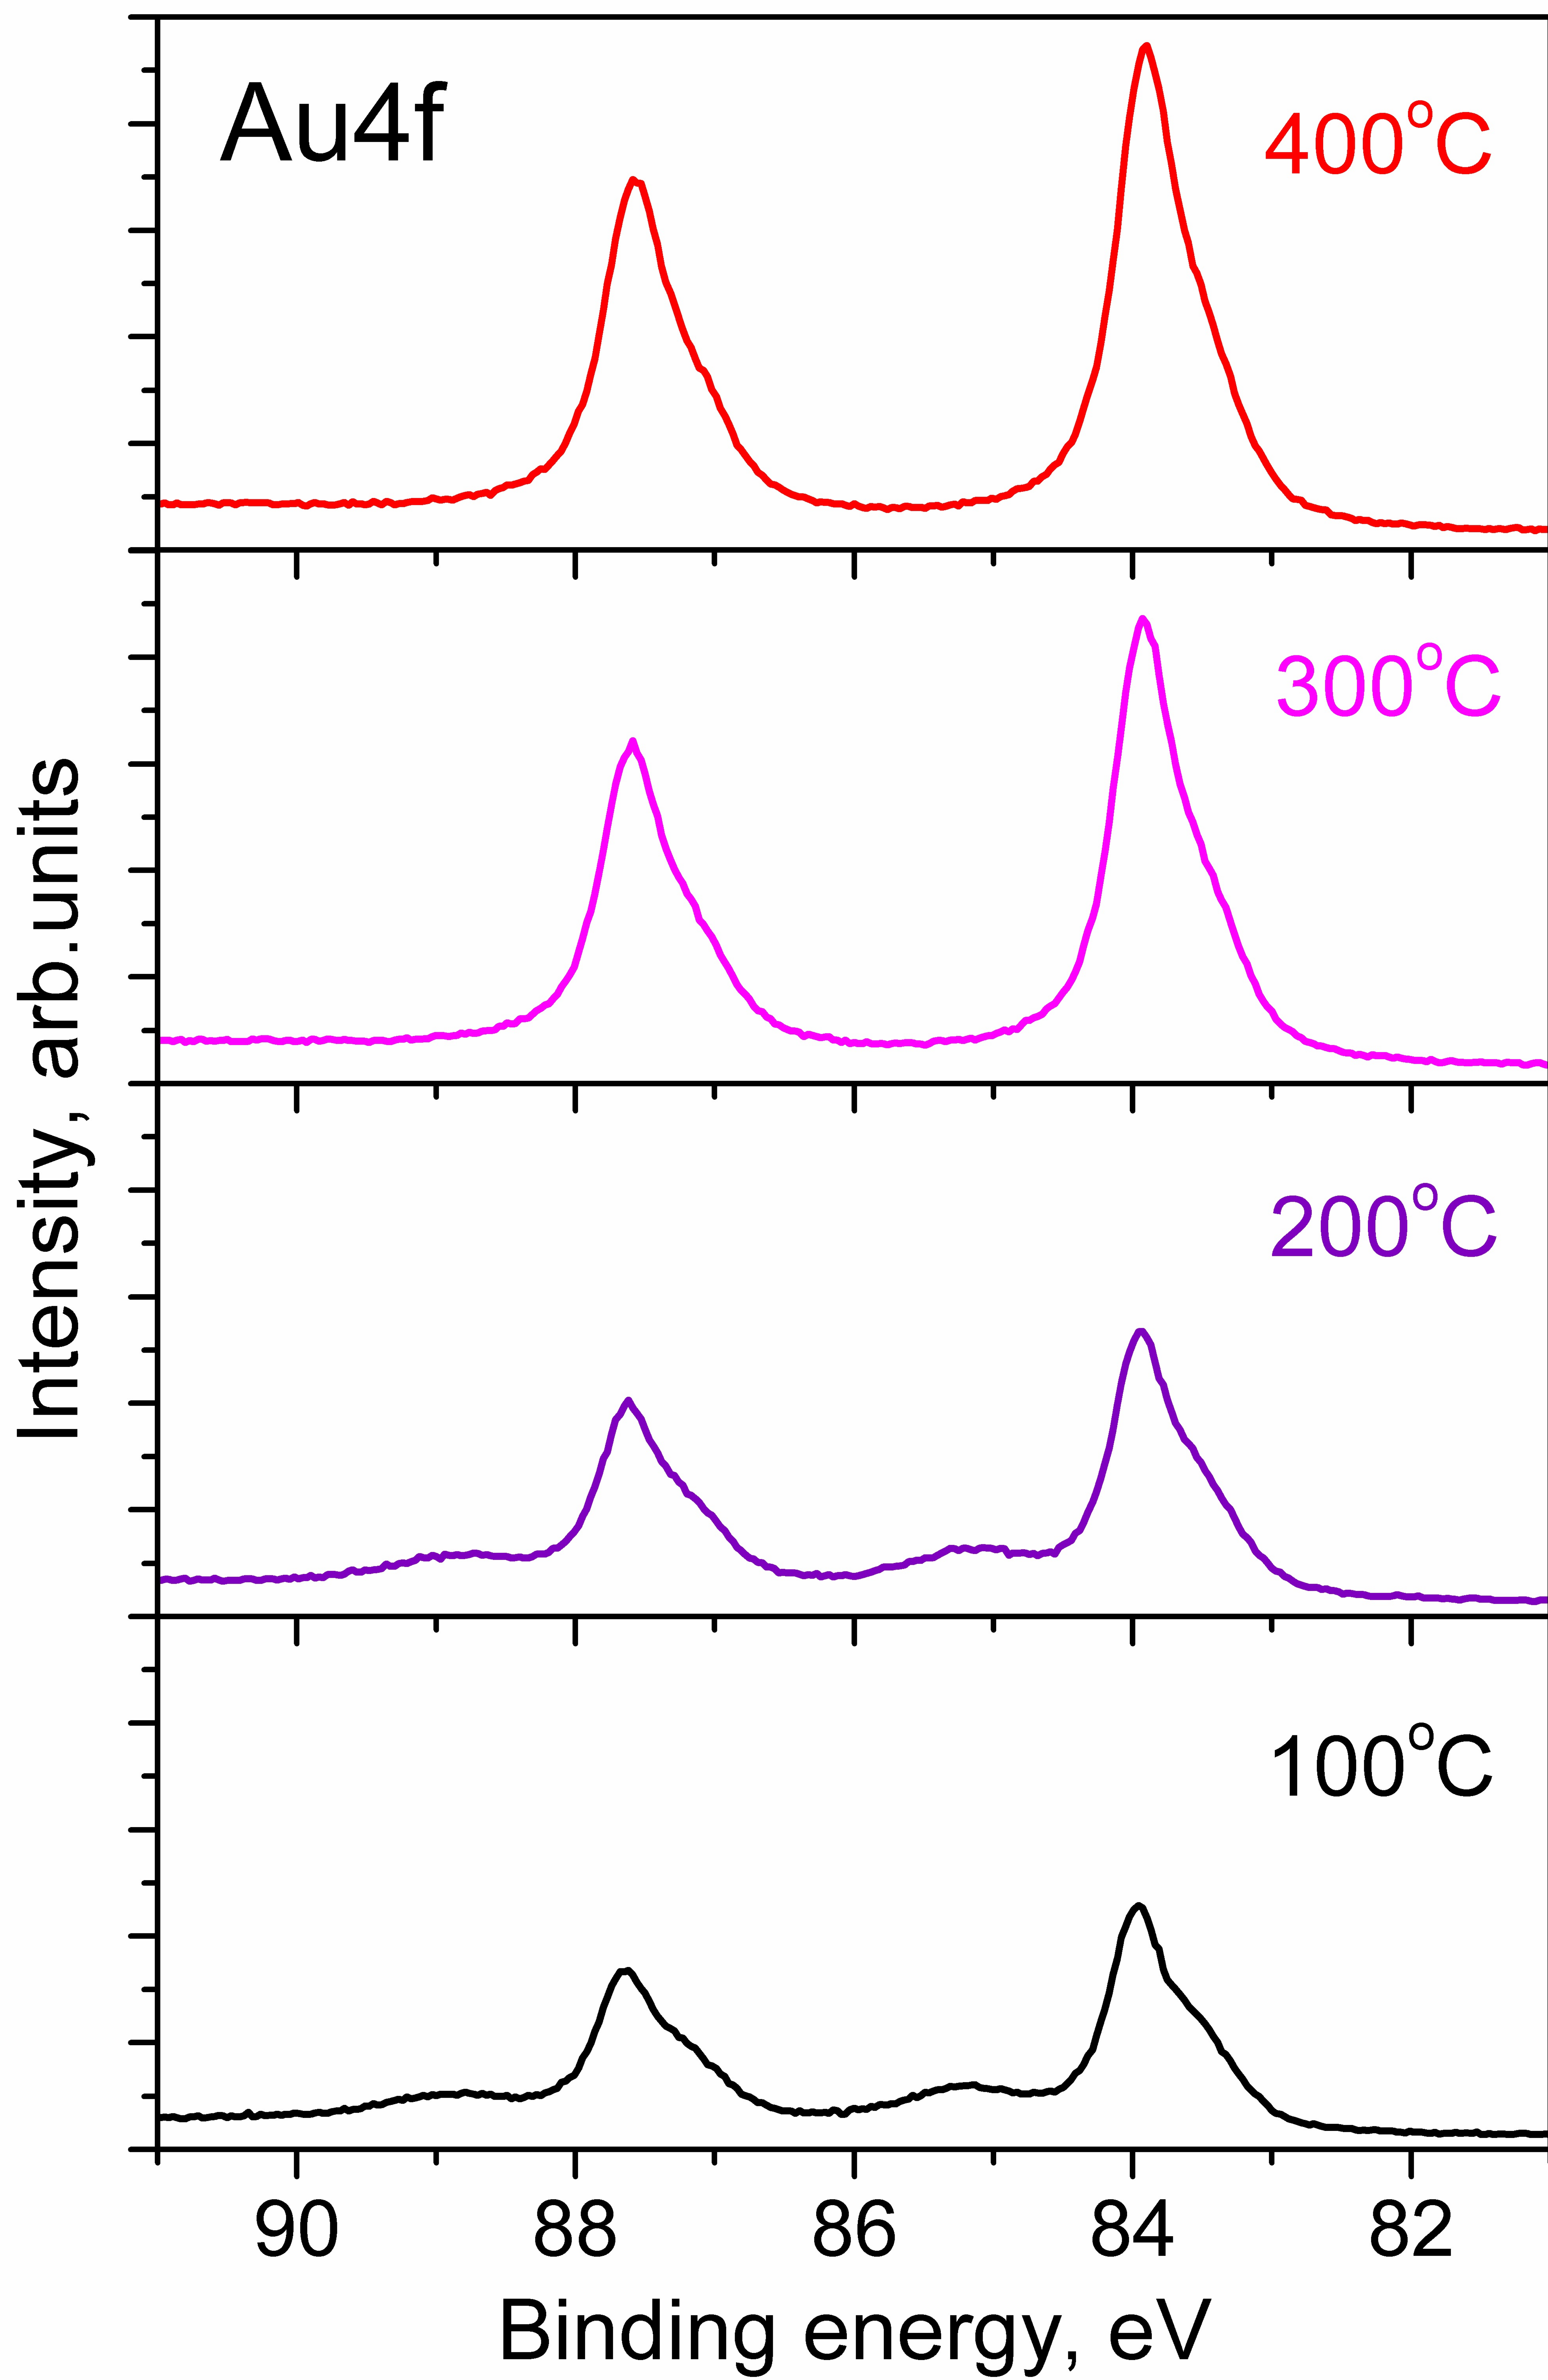

Supplement: c4cp00308j4.pdf [file c4cp00308j4.pdf]

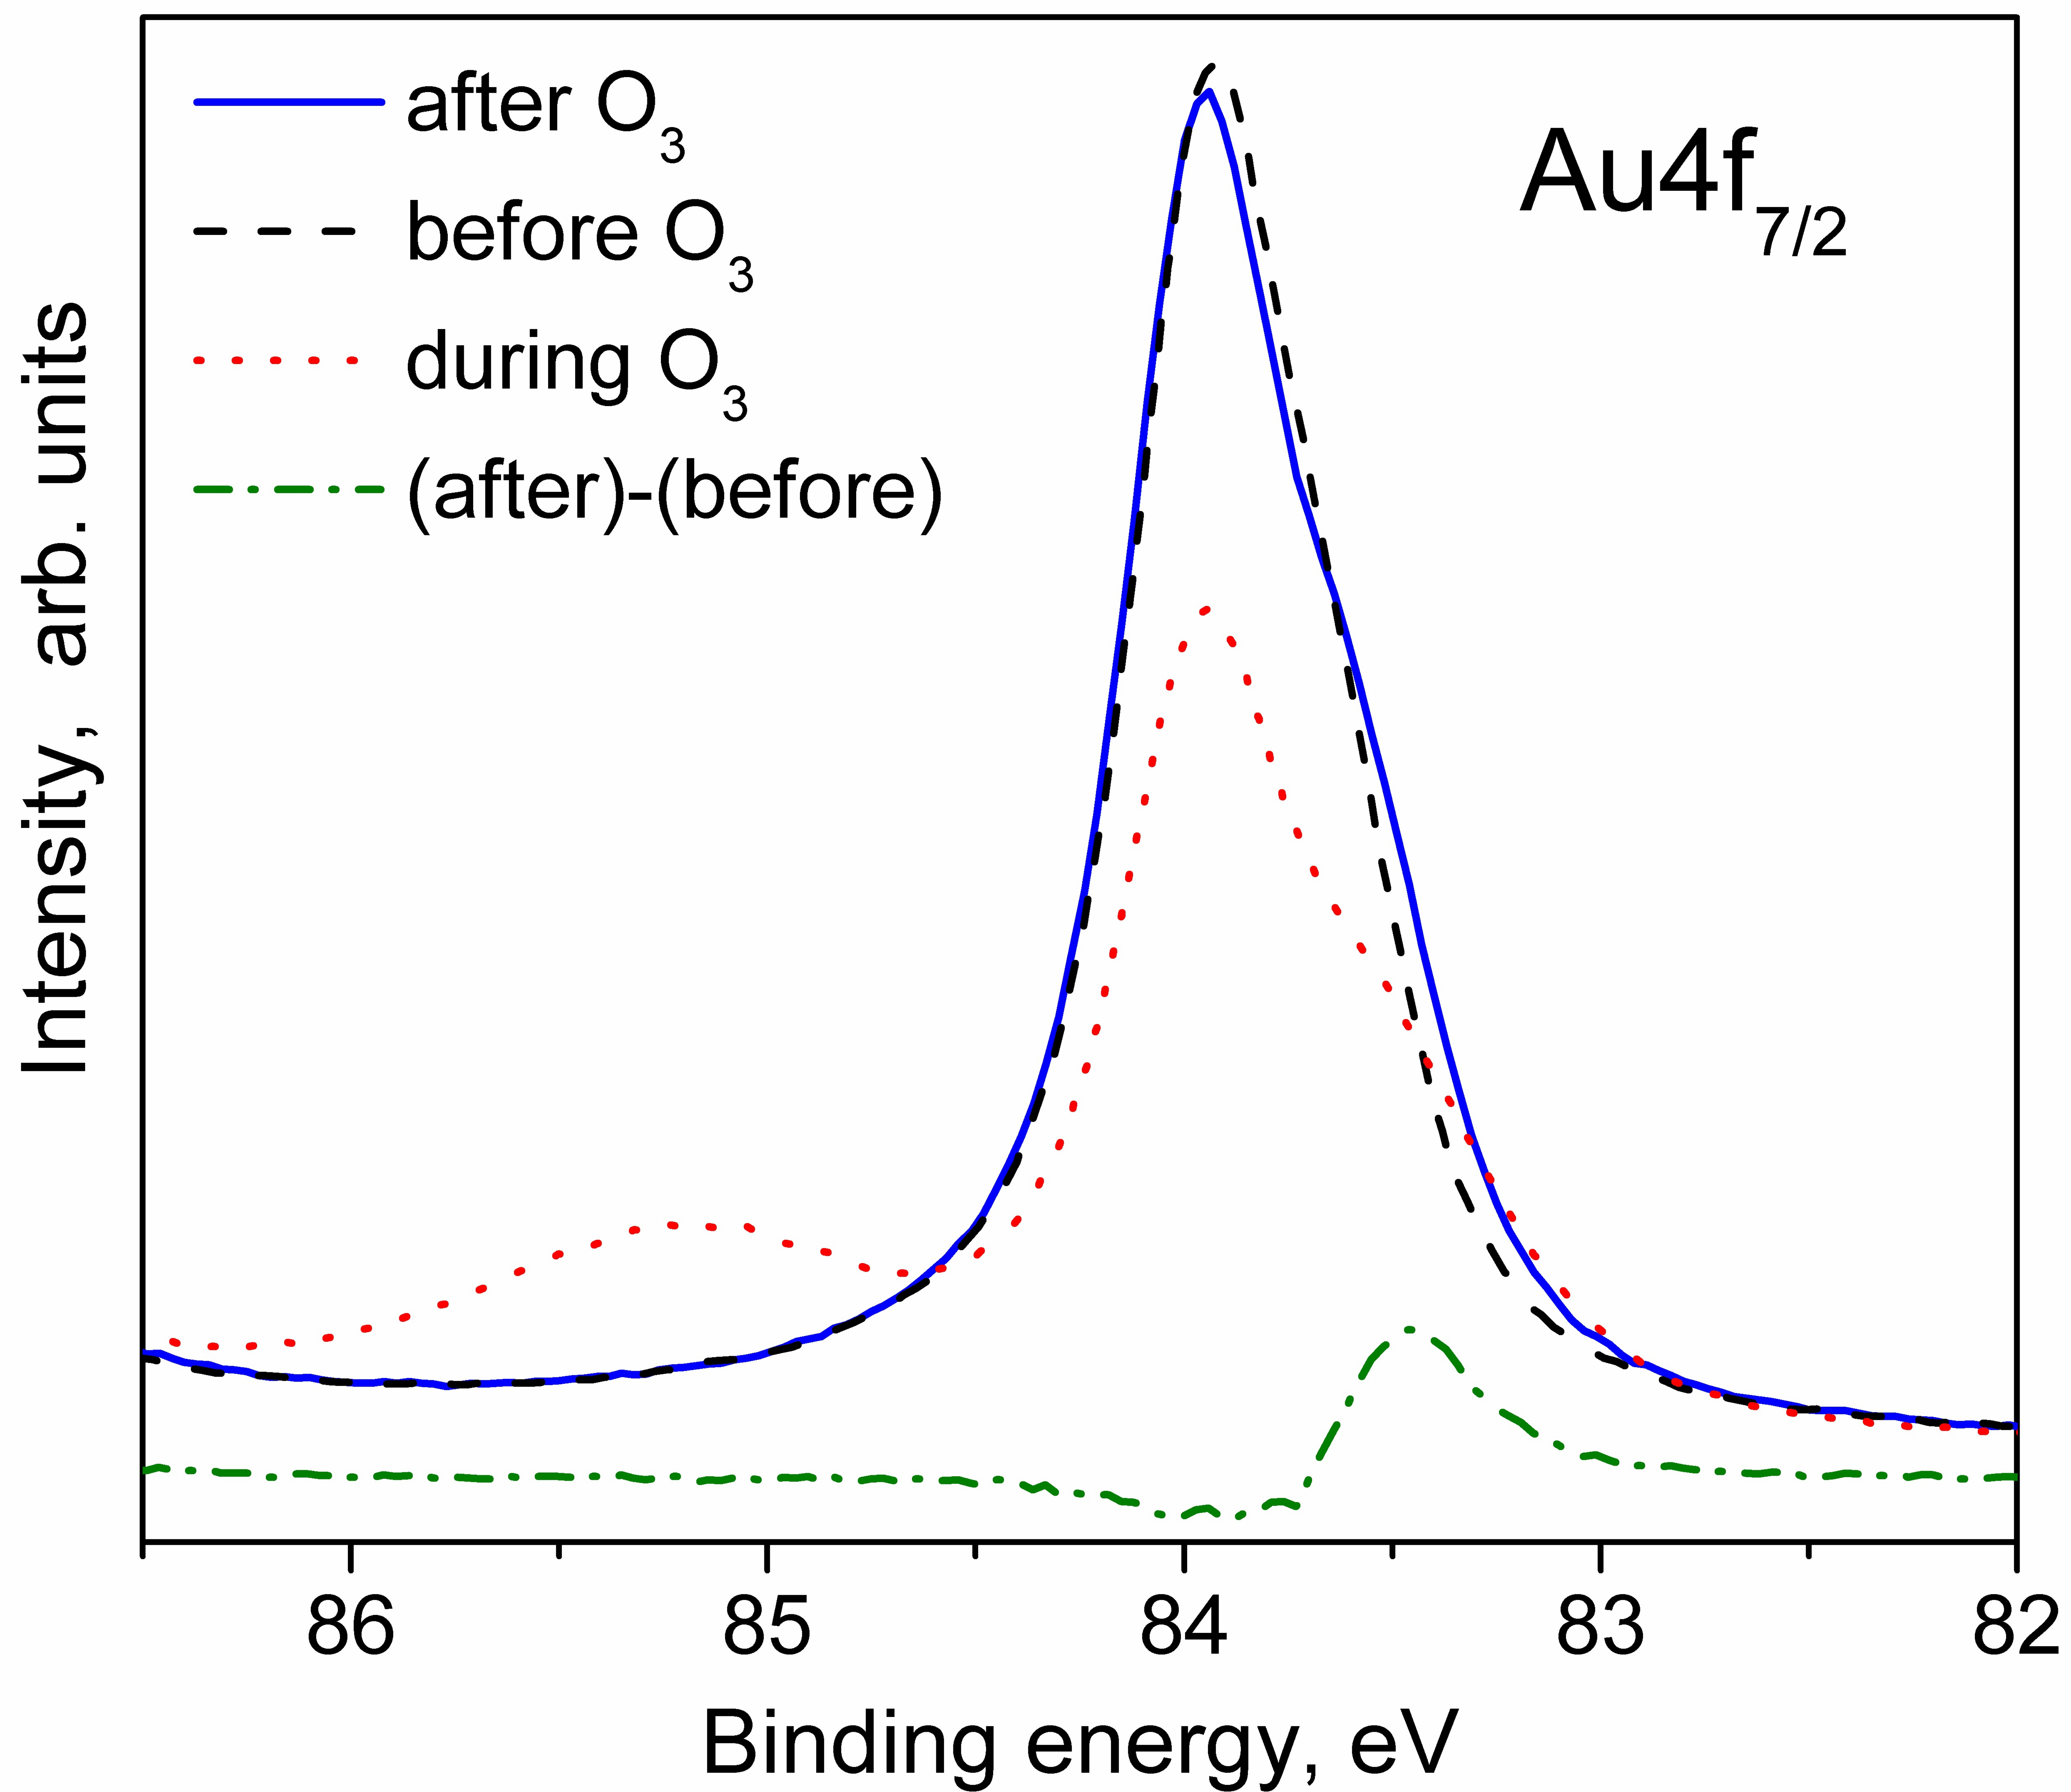

Supplement: c4cp00308j5.pdf [file c4cp00308j5.pdf]
